# Supplementary material for: Proteus Project - CRISPR-Based Programmable Therapeutics for Targeted Apoptosis in Cancer Cells
Source: Research Square preprint supplement (doi:10.21203/rs.3.rs-7160959/v1), 2025-07-29

## Supplementary Figure

Figure S1. Full uncropped Western blot of GSDME cleavage products from yeast expressing the KRAS G12D target RNA and GSDME-Csx29.

**Figure S1. Full uncropped Western blot of GSDME cleavage products from yeast expressing the KRAS G12D target RNA and GSDME-Csx29.**

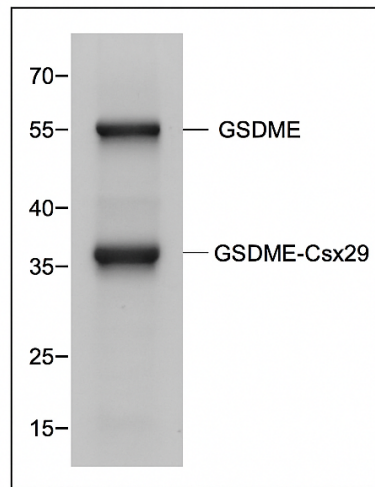

Supplement: Supplementary file 1 [file 99425f41ecf8569028e506cf.pdf]
